# Supplementary material for: Daptomycin and AgNP co-loaded rGO nanocomposites for specific treatment of Gram-positive bacterial infection in vitro and in vivo
Source: Royal Society of Chemistry journal article supplement (doi:10.1039/c9bm01229j), 2019-01-01
Supplement: c9bm01229j1.pdf [file c9bm01229j1.pdf]

## Supporting Information

### Daptomycin and AgNPs co-loaded rGO nanocomposites for specific treatment of Gram-positive bacterial infection *in vitro* and *in vivo*

Chunyi Tong<sup>1#</sup>, Li Li<sup>1#</sup>, Feng Xiao<sup>1</sup>, Jialong Fan<sup>1</sup>, Xianghua Zhong<sup>1</sup>, Xuanming Liu, Bin Liu<sup>1\*</sup>, Zhaohui Wu<sup>2\*</sup>,

Jianqun Zhou<sup>3</sup>

<sup>1</sup>College of Biology, Hunan Province Key Laboratory of Plant Functional Genomics and Developmental Regulation, Hunan University, Changsha, 410082, PR China

<sup>2</sup>Hunan Hybrid Rice Research Center/State key Laboratory of Hybrid Rice, Changsha, 410125, PR China

<sup>3</sup>Hunan Institute of Agricultural Information and Engineering, Changsha, 410125, PR China

\* To whom correspondence should be addressed. Tel: +86 731 89720939; Fax: +86 731 89720939;

E-mail: binliu2001@hotmail.com (B. Liu); wuzhaohuihrrc@163.com (Z.H. Wu)

Table S1. The semi-diameters of inhibiting zone were caused by treatment of different nanomaterial.

| Pathogenic bacterial | The semi-diameter of transparent circle (cm) |            |           |            |     |     |
|----------------------|----------------------------------------------|------------|-----------|------------|-----|-----|
|                      | rGO@Ag@Dap                                   | rGO@Ag+Dap | rGO@Ag    | Daptomycin | rGO | PBS |
| <i>E.coli</i>        | 2.35±0.16                                    | 2.38±0.18  | 2.37±0.08 | 0          | 0   | 0   |
| <i>P.aeruginosa</i>  | 2.40±0.12                                    | 2.39±0.08  | 2.38±0.09 | 0          | 0   | 0   |
| <i>B.subtilis</i>    | 4.16±0.12                                    | 3.66±0.13  | 2.00±0.06 | 1.25±0.07  | 0   | 0   |
| <i>S.aureus</i>      | 4.28±0.13                                    | 3.54±0.17  | 2.10±0.22 | 1.65±0.27  | 0   | 0   |

Table S2. Minimum inhibitory concentrations (MICs) of each sample determined against *B.subtilis* and *S. aureus*.

|            | <i>B.subtilis</i> | <i>S.aureus</i> |
|------------|-------------------|-----------------|
| Daptomycin | 25.00             | 20.00           |

|            |       |       |
|------------|-------|-------|
| rGO@Ag     | 16.29 | 12.52 |
| rGO@Ag+Dap | 12.45 | 11.78 |
| rGO@Ag@Dap | 10.8  | 9.8   |

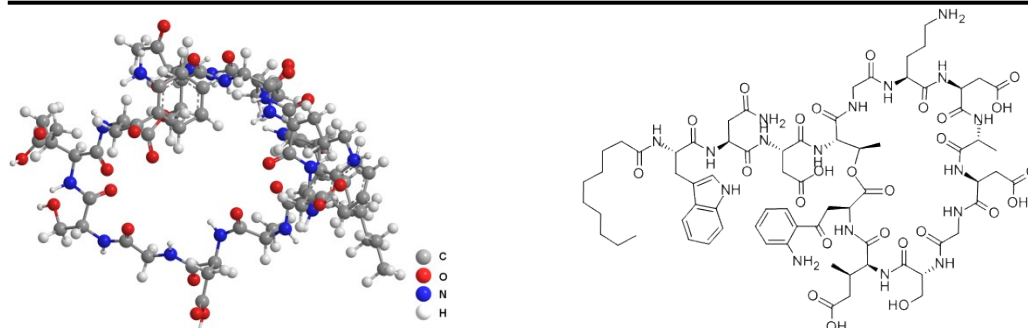

Fig. S1 The 3D (left) and plan view (right) of chemical structure of Daptomycin.

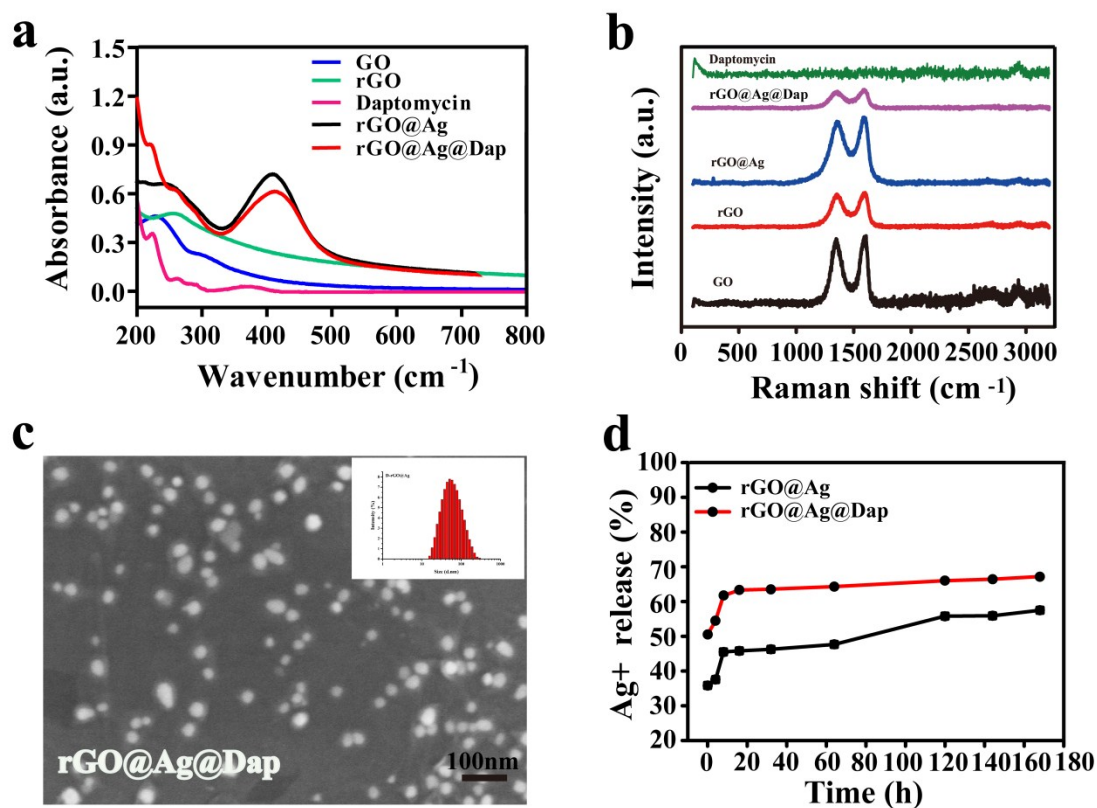

Fig.S2 (a) UV-Vis absorption spectra of GO, rGO, Daptomycin, rGO@Ag and rGO@Ag@Dap in water. (b) Raman spectra of GO, rGO, Daptomycin, rGO@Ag, rGO@Ag@Dap in water solution. (c) SEM image of rGO@Ag@Dap nanocomposites (The insert figure indicated the size of nanoparticles). (d) Cumulative silver ion release profiles for 12h from rGO@Ag and rGO@Ag@Dap nanocomposites.

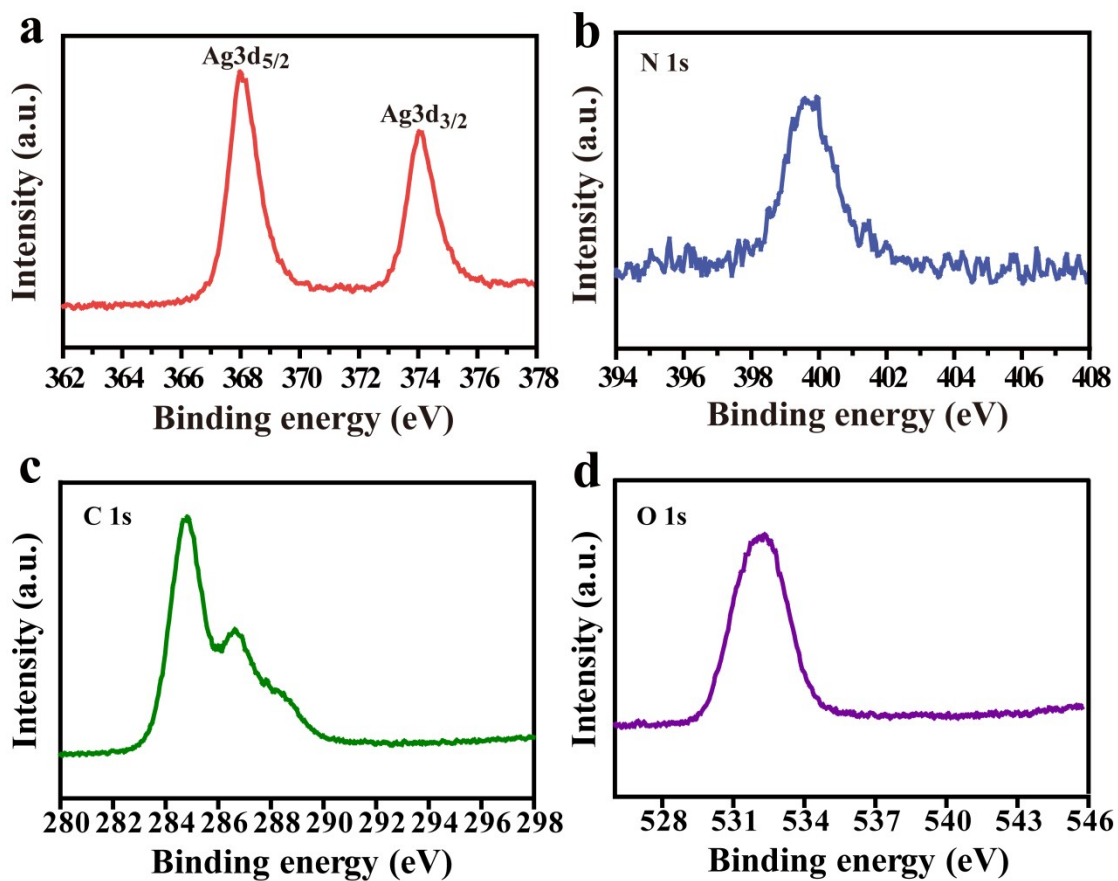

Fig.S3 XPS spectra of high-resolution (a) Ag3d, (b) N1s, (c) C 1s and (d) O1s of rGO@Ag@Dap nanocomposite.

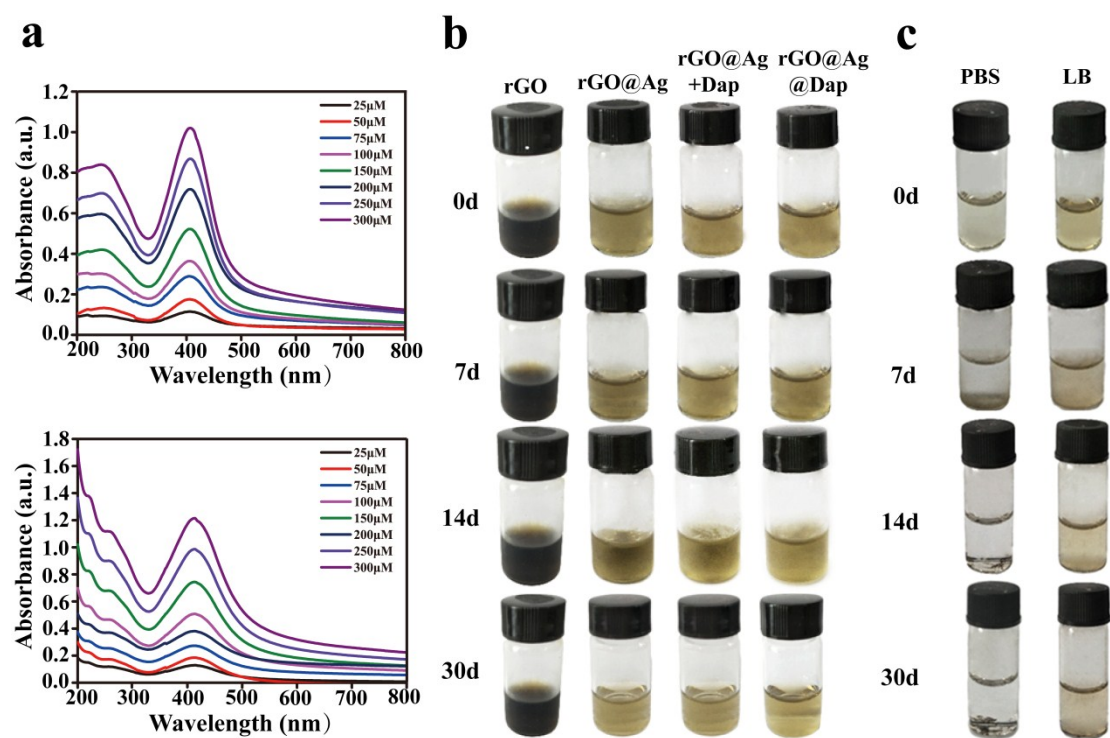

**Fig.S4** (a) The UV-Vis absorption spectra of different concentration rGO@Ag (upper) and rGO@Ag@Dap (down). (b) The stability of disperse of rGO, rGO@Ag, rGO@Ag+Dap, rGO@Ag@Dap in the water. (c) The disperse stability of rGO@Ag@Dap in different solvents.

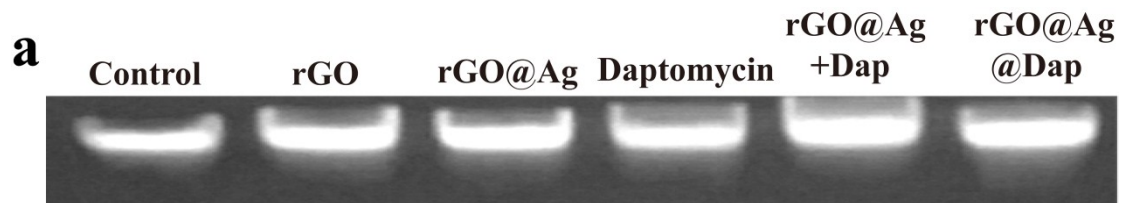

**Fig.S5** PAGE results of the extracted genomic DNA of *S.aureus* bacterial treated with PBS, rGO, rGO@Ag, Daptomycin, rGO@Ag+Dap and rGO@Ag@Dap.

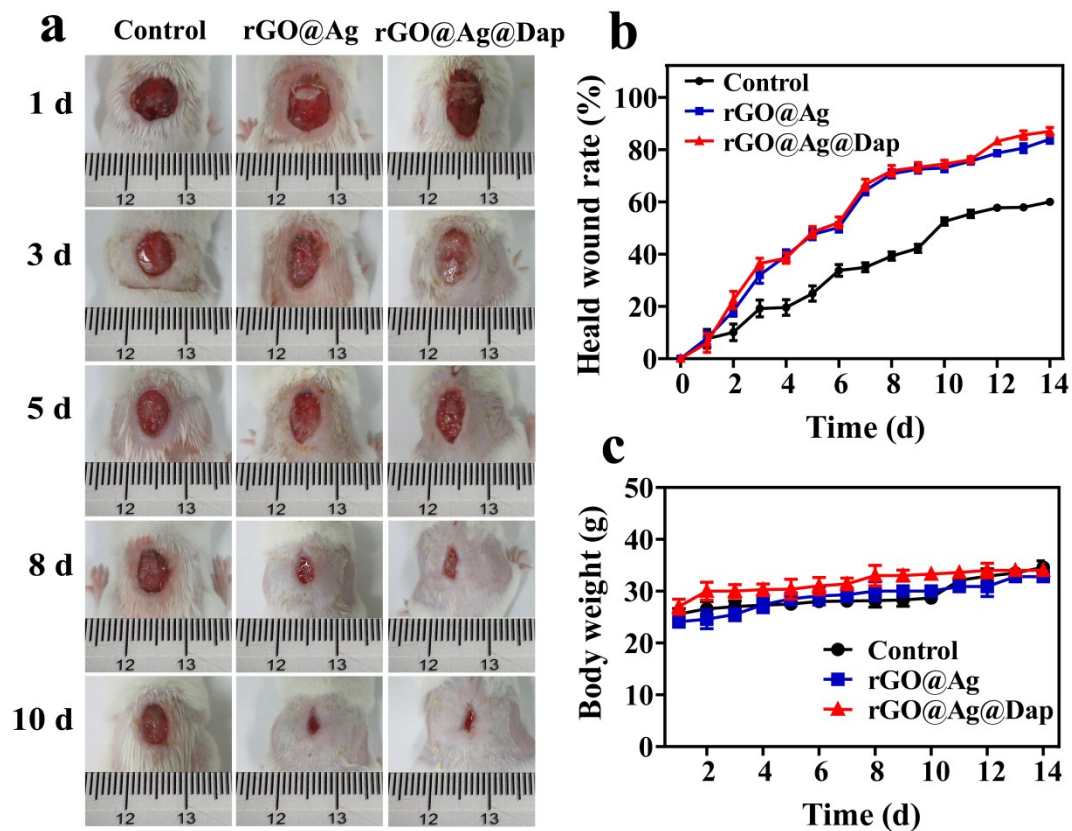

**Fig.S6** (a) The photographs of Gram-negative bacteria infected wounds in mice at different times during the therapeutic process. The mice samples were treated with PBS, rGO@Ag, rGO@Ag@Dap, respectively. (b) Corresponding the change of relative wound areas of the mice. (c) Corresponding the change of body weight of the mice.

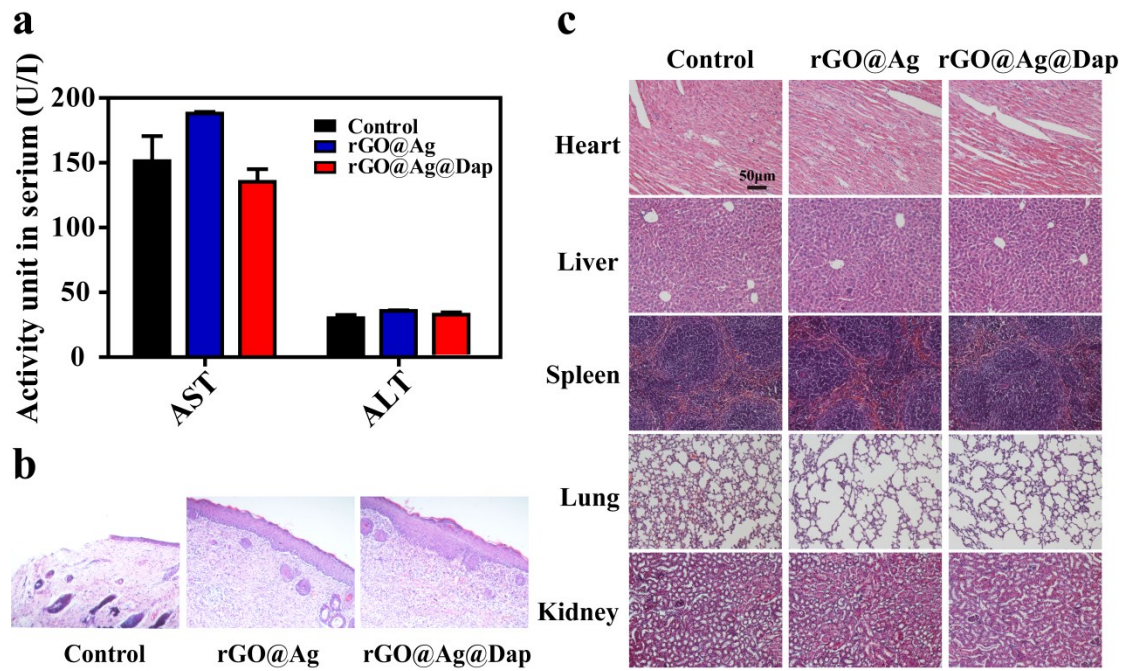

**Fig.S7** (a) AST and ALT level assay of blood of each group of mice at the 14th day. Error bars represent the standard error of 3 parallel experiments. (b) Histologic analysis of the wound tissue at day 14 by H&E staining. The scale bar is 100  $\mu\text{m}$ . (c) Photomicrographs of H&E staining of the heart, liver, spleen, lung, and kidney tissues slices after intravenous injection with: PBS, rGO@Ag, and rGO@Ag@Dap.
